# Supplementary material for: Integration of scRNA and bulk RNA-sequence to construct the 5-gene molecular prognostic model based on the heterogeneity of thyroid carcinoma endothelial cell: Five-gene TC prognostic model
Source: PubMed Central journal article supplement (PMC10984871; doi:10.3724/abbs.2023254), 2024-01-08
Supplement: 23155Supplementary_data.pdf [file 23155Supplementary_data.pdf]

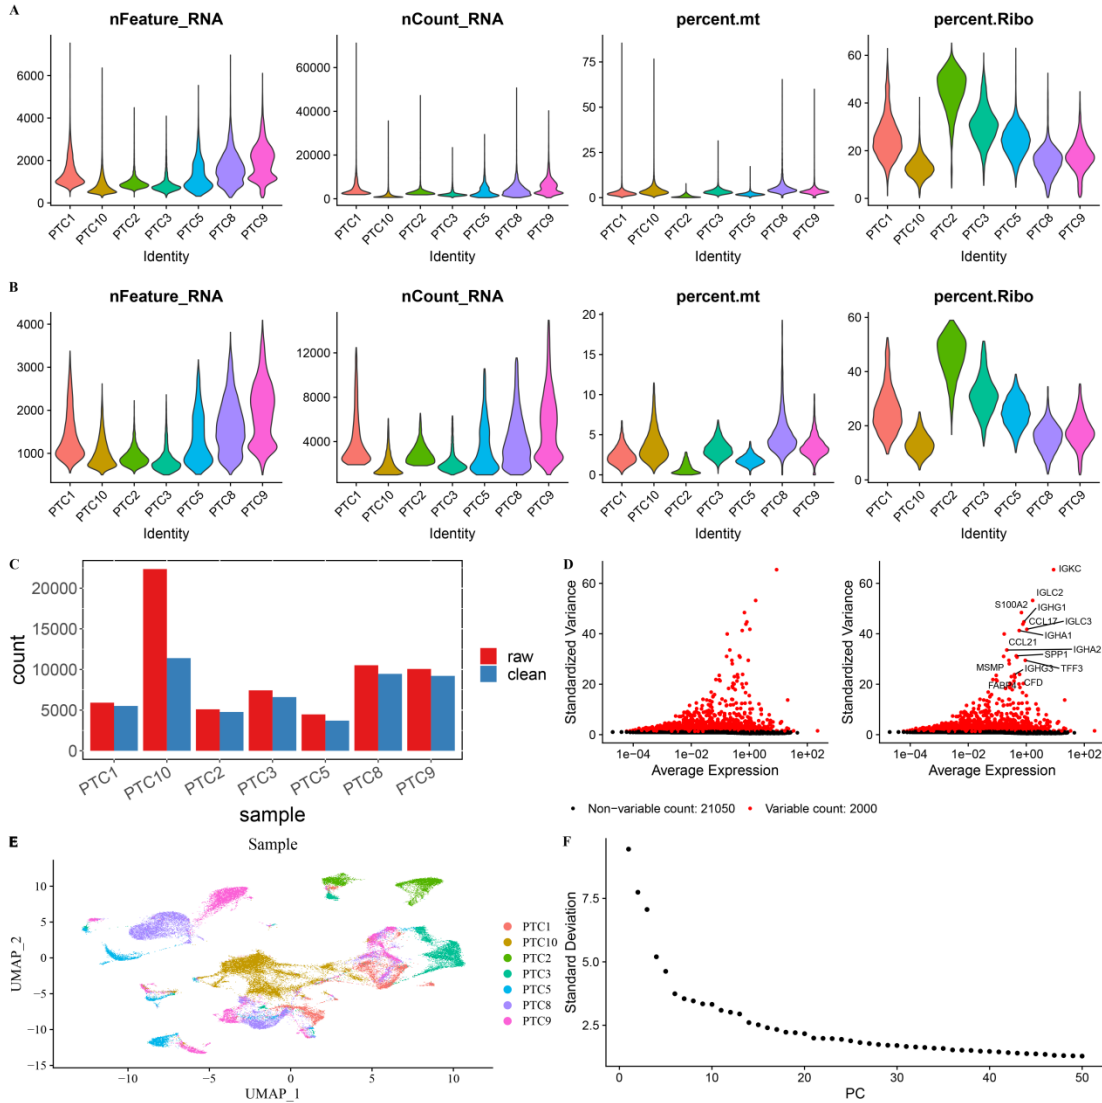

**Supplementary Figure S1. Quality filtering**

(A) The relationship between the mRNA/UMI/mitochondrial content/rRNA content of each sample before filtering. (B) The relationship between mRNA/UMI/mitochondrial content/rRNA content of each sample after filtering. (C) Number of cells before and after filtration of the samples. (C) The average expression of genes before and after filtration of the samples. (E,F) The sample distribution map of PCA dimensionality reduction, colored by sample and the anchor point map of PCA.

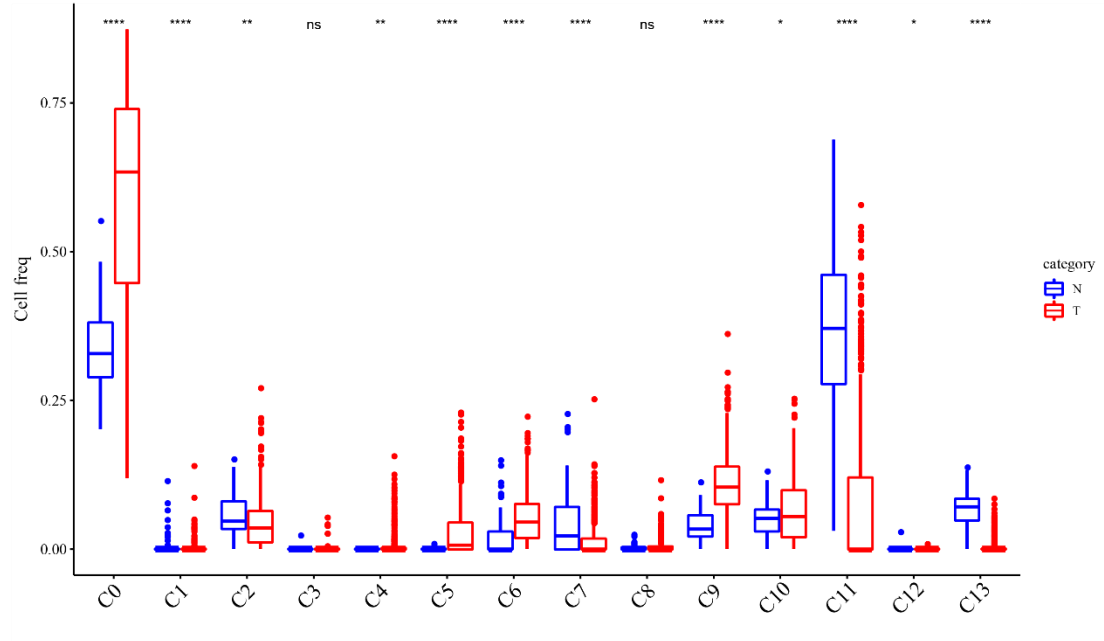

**Supplementary Figure S2. Prediction and analysis of cell clusters in TCGA cohort** Prediction of cell clusters of TCGA and comparison of the percentage of tumor cells and normal cells in each cell clusters. \*\*\*\* $P < 0.0001$ , \*\*\* $P < 0.001$ , \*\* $P < 0.01$ , and \* $P < 0.05$ .

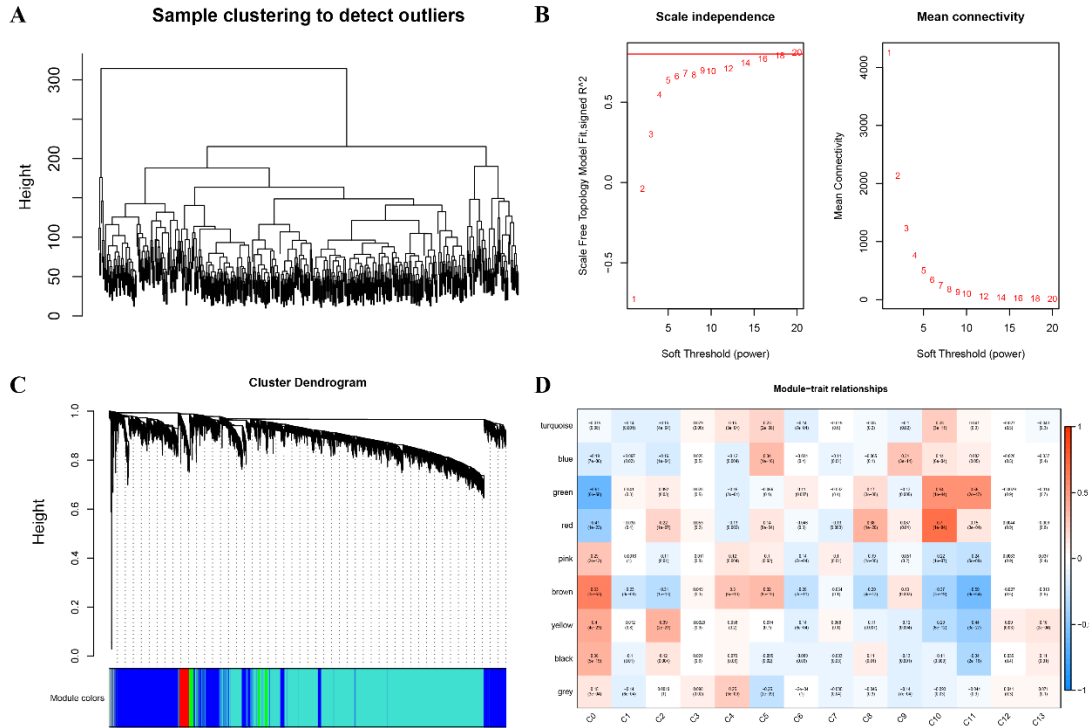

**Supplementary Figure S3. WGCNA of genes in thyroid carcinoma** (A) Clustering dendrogram of data from 487 thyroid cancer samples. (B) Analysis of the scale-free index for various soft-threshold powers and the mean connectivity for various soft-threshold powers. (C) Dendrogram of 11,386 genes. Nine coexpression modules were yielded. Each branch represents a gene, and each color represents a coexpression module. (D) Heatmap of the correlation between the module eigengenes and the marker genes of 14 cell clusters. Red represents positive correlation and blue represents negative correlation. The relationship of red module and C10 is the highest

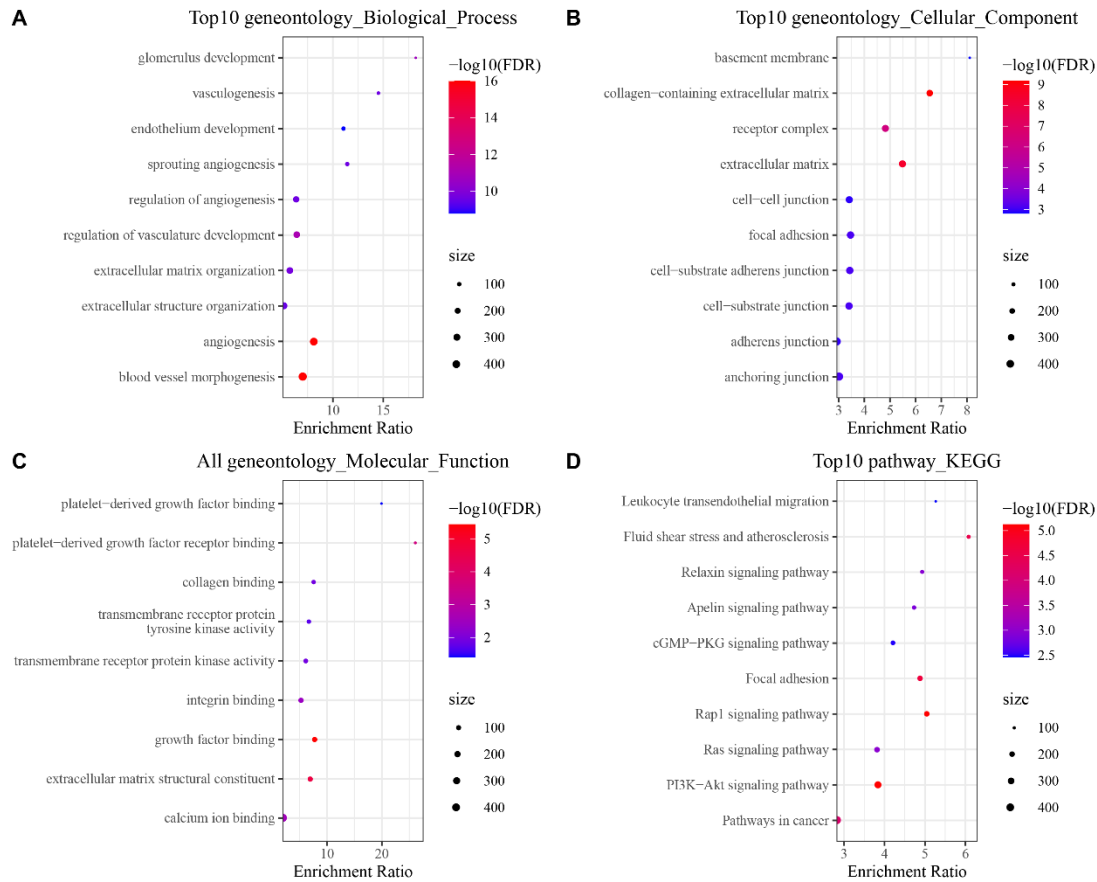

**Supplementary Figure S4. Gene Ontology and KEGG enrichment analysis of the red module genes** (A) Biological process analysis of top 10 gene ontology. (B) Cellular component analysis of top 10 gene ontology. (C) Molecular function analysis of top 10 gene ontology. (D) KEGG enrichment analysis of top 10 pathways. The term color represents the degree of enrichment. The term size represents the amount of enrichment. The x-axis shows the percentage of genes enriched.

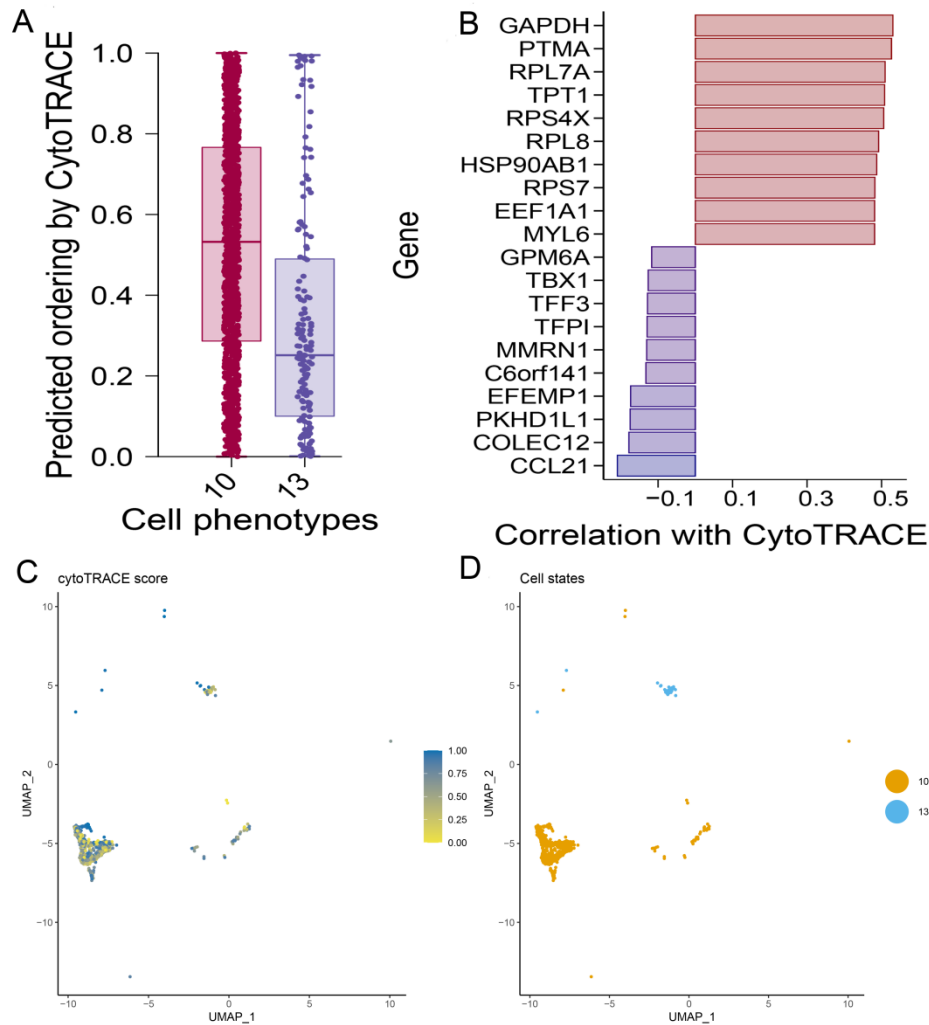

**Supplementary Figure S5. Analysis of the developmental pseudotime trajectory of crucial cell clusters** (A) Analysis of C10 and C13 belonging to Endothelial cells based on CytoTRACE. The cytoTRACE score of C10 is higher than C13. (B) Analysis the correlation of genes associated with differentiation and stem cell properties based on CytoTRACE. Red shows genes of low differentiation and blue shows genes of high differentiation. (C,D) Differentiation module on UMAP based on trajectory analysis using CytoTRACE. The degree of differentiation of C10 is low, whereas that of C13 is different.

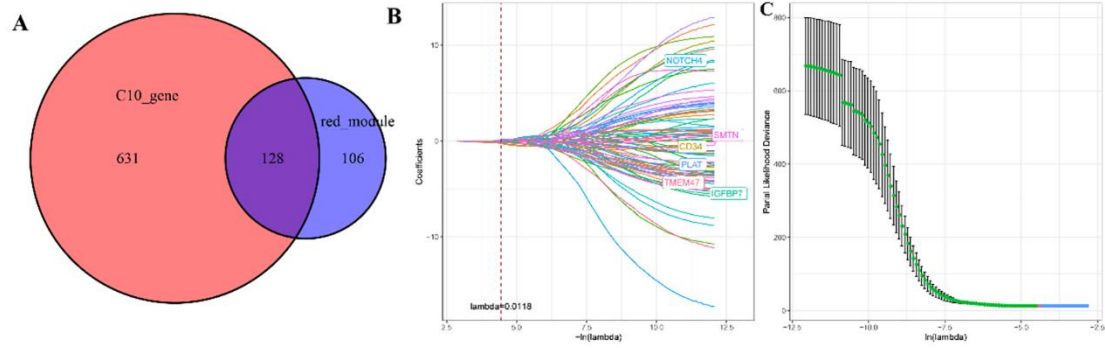

**Supplementary Figure S6. Construction of the 5-gene molecular prognostic model** (A) Venn diagram of the red module and marker genes of C10. (B) Determination of crucial genes by the LASSO analysis. (C) The optimal values of the parameter were determined by 10-round cross-validation.

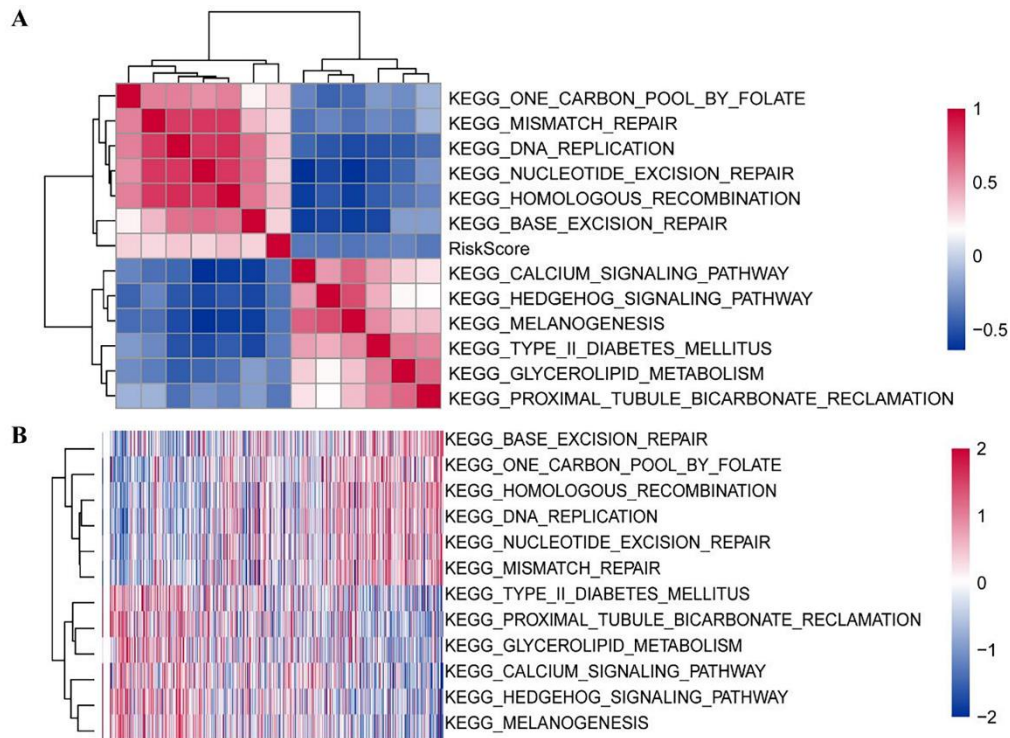

**Supplementary Figure S7. Biological pathways potentially regulated by RS** (A) Clustering KEGG pathways that the correlation with RS is greater than 0.3. (B) The relationship between crucial KEGG pathways and ssGSEA scores in all samples. The horizontal axis represents the samples, and the risk score increases successively from the left to the right.

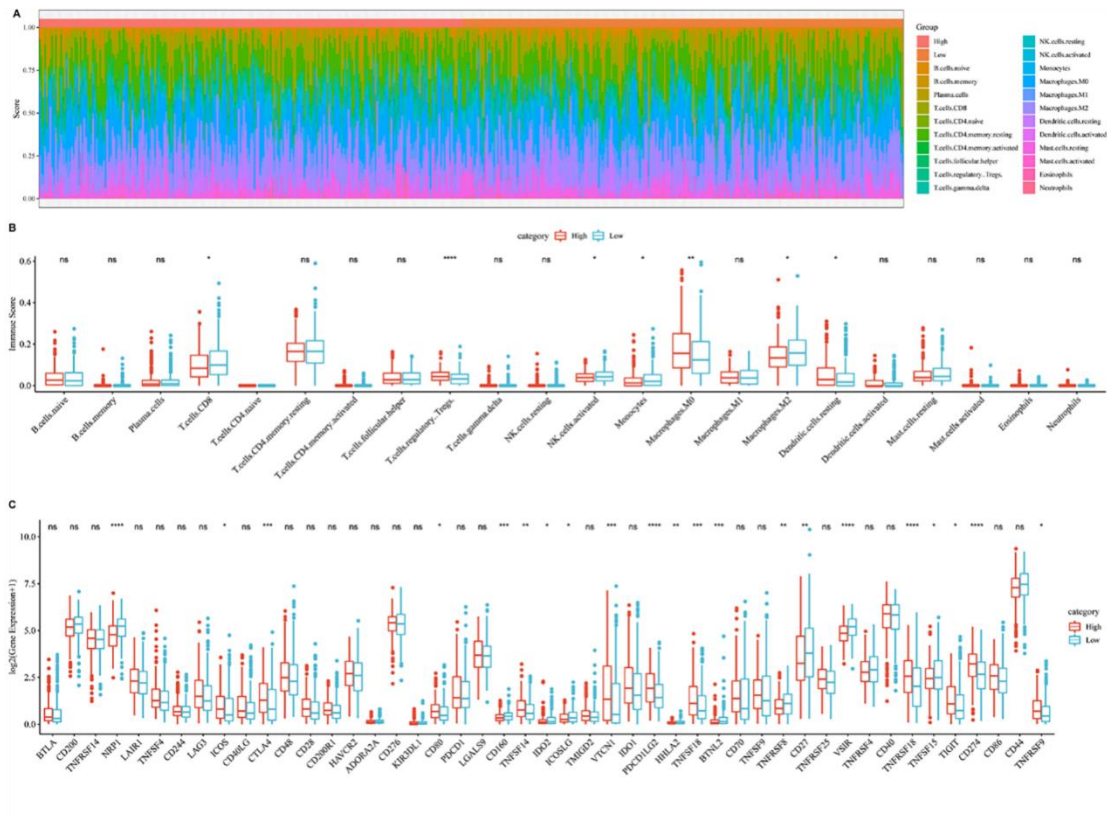

**Supplementary Figure S8. Different distributions of immune cells in high-risk group and low-risk group** (A) The ratio of 22 types of immune cells in the high-risk group and low-risk group. (B) The differences of in the high-risk group and low-risk group. (C) The differences of 47 immune checkpoints in the high-risk group and low-risk group.

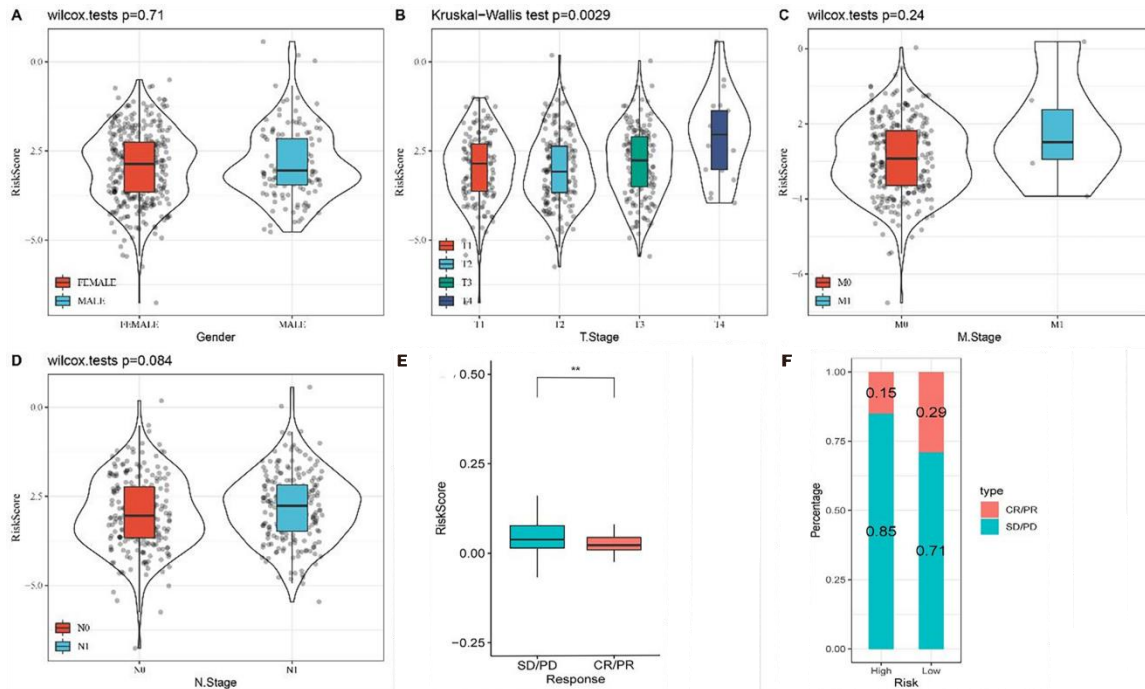

**Supplementary Figure S9. The relationship between the 5-gene molecular prognostic model and immunotherapy** (A) TIDE scores. (B) T-cell dysfunction scores. (C) T-cell rejection scores. (D) MDSC scores. (E) The risk scores in the CR/PR and SD/PD,  $**P < 0.01$ . (F) The percentages of CR/PR and SD/PD in the high and low risk groups. CR: complete response; PR: partial response; SD: substance disease; PD: progressive disease.



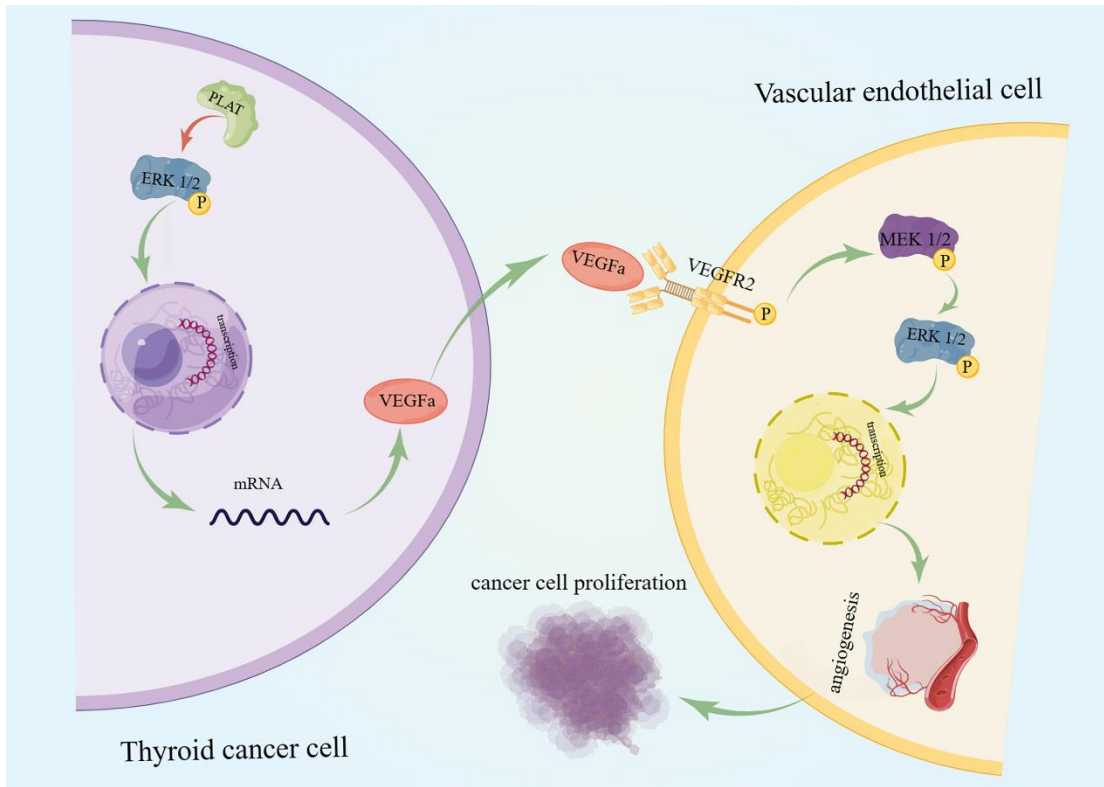

**Supplementary Figure S10. Schematic diagram summarizing the signaling pathway through which PLAT inhibits thyroid cancer angiogenesis**

**Supplementary Table S1. Crucial 128 genes associated with survival**

| Name    | <i>P</i> value | HR          | Low 95%CI   | High 95%CI  |
|---------|----------------|-------------|-------------|-------------|
| PLVAP   | 0.011641007    | 0.693205611 | 0.521470709 | 0.921497624 |
| SPARCL1 | 0.001029099    | 0.668642909 | 0.525795625 | 0.850298707 |
| FLT1    | 0.030011235    | 0.747927571 | 0.57534094  | 0.972285495 |
| RAMP2   | 0.009825917    | 0.616906767 | 0.427534721 | 0.890159185 |
| PLPP1   | 0.002737509    | 0.628767663 | 0.46414508  | 0.851778445 |
| A2M     | 0.015586901    | 0.600836429 | 0.397608228 | 0.907939998 |
| CALCRL  | 0.012940923    | 0.692333069 | 0.518070101 | 0.925212781 |
| GNG11   | 0.021276656    | 0.670946595 | 0.477742127 | 0.942285195 |
| AQP1    | 0.042694302    | 0.695241387 | 0.489179867 | 0.988104005 |
| PECAM1  | 0.019849241    | 0.57648025  | 0.362651282 | 0.91638854  |
| RAMP3   | 0.006462769    | 0.603765752 | 0.419914418 | 0.868112804 |
| EGFL7   | 0.005520933    | 0.596332532 | 0.41391862  | 0.859136244 |
| RNASE1  | 0.009089762    | 0.557368753 | 0.359262569 | 0.864715541 |
| EMCN    | 0.000487217    | 0.588745259 | 0.437153855 | 0.792903861 |
| EPAS1   | 0.00128343     | 0.583469342 | 0.420321683 | 0.809942688 |
| CLDN5   | 0.000382843    | 0.529934676 | 0.373280209 | 0.752332308 |
| EDNRB   | 0.035482328    | 0.778062747 | 0.615790183 | 0.983097254 |
| CLEC14A | 0.009333311    | 0.607490642 | 0.417195381 | 0.884585248 |

|         |             |             |             |             |
|---------|-------------|-------------|-------------|-------------|
| PODXL   | 0.026932916 | 0.690712222 | 0.497664052 | 0.958645439 |
| KDR     | 0.025976858 | 0.749116259 | 0.58092372  | 0.966004916 |
| ADGRL4  | 0.011362217 | 0.613178514 | 0.419875947 | 0.89547375  |
| IGFBP7  | 0.000471967 | 0.513773016 | 0.353695322 | 0.746299697 |
| RGCC    | 0.003410748 | 0.64823809  | 0.484970281 | 0.866470871 |
| SLCO2A1 | 0.002596345 | 0.643342013 | 0.482821497 | 0.85722974  |
| TCF4    | 0.020895665 | 0.58605838  | 0.372421109 | 0.922247468 |
| PTPRB   | 0.003366097 | 0.566417546 | 0.387368532 | 0.828226377 |
| CD34    | 0.032281228 | 0.682368886 | 0.480913426 | 0.968214385 |
| TMEM88  | 0.004135117 | 0.664407122 | 0.502427522 | 0.878607969 |
| COL15A1 | 0.033027858 | 0.710739869 | 0.519243208 | 0.972860414 |
| VWA1    | 0.012704373 | 0.61626491  | 0.421129577 | 0.901818489 |
| TM4SF18 | 0.01221424  | 0.657223023 | 0.473301969 | 0.91261421  |
| APOLD1  | 0.011372012 | 0.735602544 | 0.579930833 | 0.933061448 |
| PDGFD   | 0.027788618 | 0.716061677 | 0.531792197 | 0.964181739 |
| CD93    | 0.028451702 | 0.667735062 | 0.465268387 | 0.958307345 |
| TMEM204 | 0.003209874 | 0.608394122 | 0.437167003 | 0.846686517 |
| ABCG2   | 0.000252874 | 0.535460502 | 0.383205689 | 0.74820901  |
| MMRN2   | 0.009414801 | 0.606025768 | 0.415252214 | 0.884443765 |
| LDB2    | 0.003562525 | 0.612345414 | 0.440305988 | 0.851605285 |

|         |             |             |             |             |
|---------|-------------|-------------|-------------|-------------|
| CYYR1   | 0.001827709 | 0.56170305  | 0.390833199 | 0.80727614  |
| GRB10   | 0.008317645 | 0.571575866 | 0.377265873 | 0.865964813 |
| THBD    | 0.010332305 | 0.64378954  | 0.459804696 | 0.901393518 |
| FAM167B | 0.014284894 | 0.596913637 | 0.395043879 | 0.901940035 |
| PALMD   | 0.019552423 | 0.566779322 | 0.351899079 | 0.912871953 |
| NOTCH4  | 0.031303281 | 0.679368639 | 0.477835232 | 0.965901459 |
| PLAT    | 0.000150302 | 0.57096192  | 0.427324381 | 0.762880679 |
| JAM2    | 0.000254468 | 0.463430944 | 0.306906043 | 0.699784982 |
| FZD4    | 0.001988753 | 0.535651339 | 0.360595448 | 0.795690458 |
| ROBO4   | 0.016608516 | 0.651483763 | 0.4588038   | 0.925081903 |
| NOSTRIN | 0.008277145 | 0.577167329 | 0.383819086 | 0.867914435 |
| APLNR   | 0.039965046 | 0.724201932 | 0.532282771 | 0.985319208 |
| TEK     | 0.0054893   | 0.621887523 | 0.444741409 | 0.86959317  |
| ACVRL1  | 0.00930802  | 0.560168806 | 0.361936326 | 0.866973191 |
| PIK3R3  | 0.003443247 | 0.538969066 | 0.356204401 | 0.815508325 |
| LIMS2   | 0.003061886 | 0.511764851 | 0.328493019 | 0.797287151 |
| MYCT1   | 0.003612117 | 0.617019105 | 0.445726185 | 0.854140028 |
| CDA     | 0.045699622 | 0.673648789 | 0.457242325 | 0.992477437 |
| LMO2    | 0.000943625 | 0.470047334 | 0.30048208  | 0.735300075 |
| ZEB1    | 0.048727887 | 0.671975068 | 0.452553522 | 0.997783622 |

|          |             |             |             |             |
|----------|-------------|-------------|-------------|-------------|
| TMEM150C | 0.004549895 | 0.567624749 | 0.38385722  | 0.839369013 |
| MCF2L    | 0.012998479 | 0.53199433  | 0.32331173  | 0.875371788 |
| CLEC3B   | 0.003138159 | 0.675637998 | 0.520865093 | 0.87640103  |
| ACE      | 0.015348039 | 0.63111535  | 0.434998258 | 0.915650988 |
| SHANK3   | 0.008595935 | 0.592676565 | 0.401205628 | 0.875524882 |
| TMEM47   | 0.000412349 | 0.582909162 | 0.432046918 | 0.786449521 |
| RASIP1   | 0.005078804 | 0.568444595 | 0.382908589 | 0.843880932 |
| ADCY4    | 0.022087864 | 0.572124222 | 0.354672346 | 0.922897231 |
| ERG      | 0.010000188 | 0.575650949 | 0.378148584 | 0.876306375 |
| SMTN     | 0.049292799 | 0.660348701 | 0.436620966 | 0.998716144 |
| FGD5     | 0.010783512 | 0.556510447 | 0.354660542 | 0.873240298 |
| ARHGEF15 | 0.006231222 | 0.563687172 | 0.373809034 | 0.850014844 |
| SOX17    | 0.030743295 | 0.596954088 | 0.373824301 | 0.953266498 |
| NRN1     | 0.000677158 | 0.445753321 | 0.279725558 | 0.710324879 |
| NES      | 0.014249285 | 0.676137752 | 0.49444353  | 0.924599539 |
| AFAP1L1  | 0.02663669  | 0.6438852   | 0.436282918 | 0.950273627 |
| SPRY4    | 0.043193022 | 0.688712875 | 0.479769846 | 0.988652012 |
| GIMAP7   | 0.001166237 | 0.581192672 | 0.418850302 | 0.806457391 |
| GIMAP8   | 0.000791827 | 0.552369165 | 0.390544456 | 0.781247025 |
| PDGFB    | 0.029153026 | 0.629433102 | 0.415249288 | 0.954092016 |

|        |             |             |             |             |
|--------|-------------|-------------|-------------|-------------|
| SH2D3C | 0.007737108 | 0.591920336 | 0.402411374 | 0.870675402 |
| SOCS2  | 0.000434958 | 0.454234232 | 0.292642398 | 0.70505415  |
| GIMAP6 | 0.003078252 | 0.584520896 | 0.409616052 | 0.834109592 |
| IFITM2 | 0.040716508 | 0.656294318 | 0.438453103 | 0.98236785  |
| KLF2   | 0.00067224  | 0.601741793 | 0.449028137 | 0.806393086 |
| GIMAP1 | 0.000289901 | 0.412585365 | 0.255612342 | 0.66595643  |
| GRASP  | 0.014389712 | 0.610243664 | 0.410890116 | 0.906318539 |
| PLAC9  | 0.010311612 | 0.672049523 | 0.496050305 | 0.910493467 |
| LRRC8C | 0.006531647 | 0.462195573 | 0.265028198 | 0.806045355 |
| FLI1   | 0.012670653 | 0.529822434 | 0.321540765 | 0.873020911 |

---
